# Supplementary material for: Comprehensive evaluation of diabetes subtypes in a European cohort reveals stronger differences of lifestyle, education and psychosocial parameters compared to metabolic or inflammatory factors
Source: Springer Nature journal article supplement (doi:10.1186/s12933-025-02660-5), 2025-02-28
Supplement: MOESM1 [file 12933_2025_2660_MOESM1_ESM.pdf]

## Supplement

### Characterization of the identified diabetes subtypes in comparison to their respective control groups.

**Table S1: Characterization of the SAID-like subtype in comparison to their respective control group.**

|                                  | SAID-like subtype     | control subjects     | p-value <sup>a</sup>    |
|----------------------------------|-----------------------|----------------------|-------------------------|
| <b>Subjects, n (%)</b>           | 6                     | 6                    | -                       |
| <b>Female sex, n (%)</b>         | 3 (50)                | 4 (75)               | 0.61                    |
| <b>Age at examination, years</b> | 48.00 [45.25; 51.75]  | 50.00 [46.00; 61.00] | 0.49                    |
| <b>BMI, kg/m<sup>2</sup></b>     | 33.88 [25.03; 45.81]  | 22.58 [21.75; 23.64] | 4.66 x 10 <sup>-3</sup> |
| <b>Waist measure, cm</b>         | 90 [84.75; 101.25]    | 78 [74.75; 81.25]    | 2.82 x 10 <sup>-2</sup> |
| <b>Waist-hip-ratio</b>           | 0.84 [0.8; 0.89]      | 0.78 [0.73; 0.84]    | 0.14                    |
| <b>Glucose, mg/dl</b>            | 189 [174; 282]        | 91 [88; 96.61]       | 4.66 x 10 <sup>-3</sup> |
| <b>Insulin, µU/l</b>             | 0.3 [0.2; 0.7]        | 5.9 [4.47; 7.35]     | 4.25 x 10 <sup>-2</sup> |
| <b>HOMA-IR</b>                   | 0.21 [0.09; 0.54]     | 1.35 [1.05; 1.6]     | 4.26 x 10 <sup>-2</sup> |
| <b>HOMA-beta</b>                 | 0.81 [0.59; 1.1]      | 66.78 [53.05; 91.61] | 4.66 x 10 <sup>-3</sup> |
| <b>Triglycerides, mmol/l</b>     | 116.5 [74.25; 149.25] | 73 [63.75; 96.75]    | 0.28                    |
| <b>Total cholesterol, mmol/l</b> | 4.66 [4.4; 5.19]      | -                    | -                       |
| <b>CRP, mg/l</b>                 | 1.8 [0.8; 5.19]       | -                    | -                       |
| <b>IL-6, pg/ml</b>               | 4.1 [1.98; 5.33]      | 2.9 [2.03; 3.37]     | 0.34                    |
| <b>WNT5a, pg/ml</b>              | 0.48 [0.2; 0.56]      | -                    | -                       |
| <b>SFRP5, pg/ml</b>              | 3.85 [3.44 - 5.25]    | -                    | -                       |
| <b>GLP-1, pg/ml</b>              | 4.83 [3.48; 7.22]     | 3.62 [2.77; 4.53]    | 0.24                    |

Continuous data is displayed as median [Interquartile Range]; female sex as number (percentage). <sup>a</sup>Statistical significance between the SAID subtype and the control group was tested using Chi2-tests for categorical variables and Kruskal-Wallis-tests for continuous variables. **Abbreviations:** BMI, Body Mass Index; HOMA-IR, Homeostatic Model Assessment of Insulin Resistance; HOMA-beta, Homeostatic Model Assessment of beta-cell function; CRP, C-reactive protein; IL-6, interleukin 6; Wnt5a, WNT Family Member 5a; SFRP5, secreted frizzled related protein 5; GLP-1, Glucagon-like peptide 1.

**Table S2: Characterization of the SIDD-like subtype in comparison to their respective control group.**

|                           | SIDD-like subtype       | control subjects       | p-value <sup>a</sup>    |
|---------------------------|-------------------------|------------------------|-------------------------|
| Subjects, n (%)           | 64                      | 64                     | -                       |
| Female sex, n (%)         | 32 (50)                 | 45 (71.88)             | 3.03 x 10 <sup>-2</sup> |
| Age at examination, years | 53.5 [47; 59.25]        | 51 [46; 63.25]         | 0.7                     |
| BMI, kg/m <sup>2</sup>    | 42.17 [33.04; 50.38]    | 22.56 [21.63; 23.47]   | < 10 <sup>-5</sup>      |
| Waist measure, cm         | 118 [110; 131]          | 80 [76; 86]            | < 10 <sup>-5</sup>      |
| Waist-hip-ratio           | 0.96 [0.92; 1.01]       | 0.81 [0.77; 0.85]      | < 10 <sup>-5</sup>      |
| Glucose, mg/dl            | 151.5 [124.; 207.5]     | 91 [87; 95]            | < 10 <sup>-5</sup>      |
| Insulin, µU/l             | 29.25 [14.73; 53.33]    | 5.00 [3.9; 6.6]        | < 10 <sup>-5</sup>      |
| HOMA-IR                   | 12.26 [5.92; 24.35]     | 1.19 [0.84; 1.48]      | < 10 <sup>-5</sup>      |
| HOMA-beta                 | 95.05 [64.56; 192.16]   | 70.16 [54; 88.3]       | < 10 <sup>-5</sup>      |
| Triglycerides, mg/dl      | 197.5 [120.25; 275.5]   | 70.5 [54.75; 87]       | < 10 <sup>-5</sup>      |
| Total cholesterol, mmol/l | 4.41 [3.74; 5.04]       | 4.42 [4; 4.58]         | 0.25                    |
| CRP, mg/l                 | 5.65 [2.65; 11.32]      | 0.8 [0.8; 0.8]         | < 10 <sup>-5</sup>      |
| IL-6, pg/ml               | 5.05 [3.27; 8.2]        | 1.9 [1.5; 2.95]        | < 10 <sup>-5</sup>      |
| WNT5a, pg/ml              | 0.39 [0.29; 0.59]       | 0.32 [0.24; 0.5]       | 0.19                    |
| SFRP5, pg/ml              | 8.26 [1.31; 20.98]      | 7.03 [2.21; 19.85]     | 0.84                    |
| GLP-1, pg/ml              | 11.75 [4.18; 15.86]     | 4.33 [2.66; 6.17]      | < 10 <sup>-5</sup>      |
| sDPP-4, ng/ml             | 543.55 [405.02; 728.47] | 512.6 [450.51; 652.56] | 0.8                     |

Continuous data is displayed as median [Interquartile Range]; female sex as number (percentage). <sup>a</sup>Statistical significance between the SIDD subtype and the control group was tested using Chi2-tests for categorical variables and Kruskal-Wallis-tests for continuous variables. **Abbreviations:** BMI, Body Mass Index; HOMA-IR, Homeostatic Model Assessment of Insulin Resistance; HOMA-beta, Homeostatic Model Assessment of beta-cell function; CRP, C-reactive protein; IL-6, interleukin 6; Wnt5a, WNT Family Member 5a; SFRP5, secreted frizzled related protein 5; GLP-1, Glucagon-like peptide 1; sDPP-4, soluble Dipeptidylpeptidase 4.

**Table S3: Characterization of the SIRD-like subtype in comparison to their respective control group.**

|                                  | <b>SIRD-like subtype</b> | <b>control subjects</b> | <b>p-value<sup>a</sup></b> |
|----------------------------------|--------------------------|-------------------------|----------------------------|
| <b>Subjects, n (%)</b>           | 66                       | 66                      | -                          |
| <b>Female sex, n (%)</b>         | 36 (54.38)               | 47 (73.85)              | 0.07                       |
| <b>Age at examination, years</b> | 55 [44; 64]              | 53 [48; 65]             | 0.94                       |
| <b>BMI, kg/m<sup>2</sup></b>     | 41.85 [32.75; 50.25]     | 22.26 [20.79; 23.63]    | < 10 <sup>-5</sup>         |
| <b>Waist measure, cm</b>         | 122 [110; 137]           | 81 [75; 88]             | < 10 <sup>-5</sup>         |
| <b>Waist-hip-ratio</b>           | 0.98 [0.93; 1.02]        | 0.79 [0.76; 0.87]       | < 10 <sup>-5</sup>         |
| <b>Glucose, mg/dl</b>            | 121 [109; 162]           | 91 [86; 95]             | < 10 <sup>-5</sup>         |
| <b>Insulin, µU/l</b>             | 34.9 [20.8; 50.9]        | 5.7 [4.5; 7]            | < 10 <sup>-5</sup>         |
| <b>HOMA-IR</b>                   | 10.92 [5.85; 16.87]      | 1.27 [1.03; 1.64]       | < 10 <sup>-5</sup>         |
| <b>HOMA-beta</b>                 | 174.46 [101.45; 341.18]  | 72 [57; 88.71]          | < 10 <sup>-5</sup>         |
| <b>Triglycerides, mg/dl</b>      | 171 [135; 214]           | 84 [67; 101]            | < 10 <sup>-5</sup>         |
| <b>Total cholesterol, mmol/l</b> | 4.2 [3.65; 4.65]         | 4.5 [3.98; 4.75]        | 0.21                       |
| <b>CRP, mg/l</b>                 | 4.1 [2; 10.3]            | 0.8 [0.8; 1.4]          | < 10 <sup>-5</sup>         |
| <b>IL-6, pg/ml</b>               | 4.9 [3.6; 6.5]           | 2.4 [1.5; 3.3]          | < 10 <sup>-5</sup>         |
| <b>WNT5a, pg/ml</b>              | 0.35 [0.24; 0.46]        | 0.35 [0.27; 0.51]       | 0.76                       |
| <b>SFRP5, pg/ml</b>              | 5.07 [1.32; 28.5]        | 4.09 [1.81; 11.78]      | 0.44                       |
| <b>GLP-1, pg/ml</b>              | 9.89 [5.14; 15.5]        | 5.25 [3.65; 7.66]       | 6.71 x 10 <sup>-5</sup>    |
| <b>sDPP-4, ng/ml</b>             | 527.23 [402.93; 646.39]  | 452.05 [350.89; 572.14] | 0.14                       |

Continuous data is displayed as median [Interquartile Range]; female sex as number (percentage). <sup>a</sup>Statistical significance between the SIRD subtype and the control group was tested using Chi2-tests for categorical variables and Kruskal-Wallis-tests for continuous variables. **Abbreviations:** BMI, Body Mass Index; HOMA-IR, Homeostatic Model Assessment of Insulin Resistance; HOMA-beta, Homeostatic Model Assessment of beta-cell function; CRP, C-reactive protein; IL-6, interleukin 6; Wnt5a, WNT Family Member 5a; SFRP5, secreted frizzled related protein 5; GLP-1, Glucagon-like peptide 1; sDPP-4, soluble Dipeptidylpeptidase 4.

**Table S4: Characterization of the MOD-like subtype in comparison to their respective control group.**

|                           | MOD-like subtype        | control subjects        | p-value <sup>a</sup>    |
|---------------------------|-------------------------|-------------------------|-------------------------|
| Subjects, n (%)           | 37                      | 37                      | -                       |
| Female sex, n (%)         | 26 (72.22)              | 25 (69.44)              | 1                       |
| Age at examination, years | 60.5 [49.75; 64]        | 54.5 [47.75; 61.5]      | 0.08                    |
| BMI, kg/m <sup>2</sup>    | 38.96 [32.63; 42.88]    | 22.29 [20.9; 22.95]     | < 10 <sup>-5</sup>      |
| Waist measure, cm         | 118 [110; 123]          | 82 [73.88; 86]          | < 10 <sup>-5</sup>      |
| Waist-hip-ratio           | 0.95 [0.91; 1.01]       | 0.82 [0.78; 0.86]       | < 10 <sup>-5</sup>      |
| Glucose, mg/dl            | 102 [93.75; 115.75]     | 90 [87; 94]             | 2.48 x 10 <sup>-5</sup> |
| Insulin, µU/l             | 14.75 [9.43; 17.28]     | 5.25 [4; 6.9]           | < 10 <sup>-5</sup>      |
| HOMA-IR                   | 3.71 [2.50; 4.36]       | 1.16 [0.91; 1.61]       | < 10 <sup>-5</sup>      |
| HOMA-beta                 | 125.22 [75.53; 202.66]  | 64.99 [53.56; 85.7]     | 2.1 x 10 <sup>-5</sup>  |
| Triglycerides, mg/dl      | 122 [102; 147]          | 74 [58.25; 90.75]       | < 10 <sup>-5</sup>      |
| Total cholesterol, mmol/l | 4.27 [3.60; 4.97]       | 4.61 [4.34; 4.65]       | 0.55                    |
| CRP, mg/l                 | 3.5 [1.25; 8]           | 0.8 [0.8; 0.92]         | < 10 <sup>-5</sup>      |
| IL-6, pg/ml               | 4.7 [3.2; 7]            | 2 [1.5; 3.1]            | < 10 <sup>-5</sup>      |
| WNT5a, pg/ml              | 0.33 [0.22; 0.45]       | 0.39 [0.34; 0.62]       | 0.28                    |
| SFRP5, pg/ml              | 9.3 [6.19; 15.9]        | 6.12 [5.79; 12.34]      | 0.82                    |
| GLP-1, pg/ml              | 5.91 [4.16; 12.55]      | 4.8 [2.79; 8.16]        | 0.09                    |
| sDPP-4, ng/ml             | 527.28 [352.06; 594.10] | 448.17 [380.09; 574.32] | 0.9                     |

Continuous data is displayed as median [Interquartile Range]; female sex as number (percentage). <sup>a</sup>Statistical significance between the MOD subtype and the control group was tested using Chi2-tests for categorical variables and Kruskal-Wallis-tests for continuous variables. **Abbreviations:** BMI, Body Mass Index; HOMA-IR, Homeostatic Model Assessment of Insulin Resistance; HOMA-beta, Homeostatic Model Assessment of beta-cell function; CRP, C-reactive protein; IL-6, interleukin 6; Wnt5a, WNT Family Member 5a; SFRP5, secreted frizzled related protein 5; GLP-1, Glucagon-like peptide 1; sDPP-4, soluble Dipeptidylpeptidase 4.

**Table S5: Characterization of the MARD-like subtype in comparison to their respective control group.**

|                           | MARD-like subtype      | control subjects        | p-value <sup>a</sup>    |
|---------------------------|------------------------|-------------------------|-------------------------|
| Subjects, n (%)           | 35                     | 35                      | -                       |
| Female sex, n (%)         | 20 (57.14)             | 16 (45.71)              | 0.47                    |
| Age at examination, years | 70 [65.5; 73]          | 67 [58; 71]             | 1.21 x 10 <sup>-2</sup> |
| BMI, kg/m <sup>2</sup>    | 30.04 [26.32; 36.64]   | 23.18 [22.3; 23.88]     | < 10 <sup>-5</sup>      |
| Waist measure, cm         | 107.5 [96; 121.5]      | 85 [80.5; 92.5]         | < 10 <sup>-5</sup>      |
| Waist-hip-ratio           | 0.95 [0.9; 1]          | 0.84 [0.81; 0.9]        | < 10 <sup>-5</sup>      |
| Glucose, mg/dl            | 118 [106; 138]         | 94.5 [90.25; 101]       | < 10 <sup>-5</sup>      |
| Insulin, µU/l             | 17.7 [9.9; 27.25]      | 6.05 [4.5; 7.2]         | < 10 <sup>-5</sup>      |
| HOMA-IR                   | 5.2 [3.52; 7.92]       | 1.44 [1.12; 1.74]       | < 10 <sup>-5</sup>      |
| HOMA-beta                 | 111.39 [54.75; 188.22] | 68.18 [55.53; 77.94]    | 5.16 x 10 <sup>-3</sup> |
| Triglycerides, mg/dl      | 151 [121.5; 242.5]     | 75 [64; 90]             | < 10 <sup>-5</sup>      |
| Total cholesterol, mmol/l | 4.53 [4.09; 4.93]      | 4.52 [4; 4.73]          | 0.71                    |
| CRP, mg/l                 | 2.3 [0.8; 5.05]        | 0.9 [0.8; 1.65]         | 5.52 x 10 <sup>-3</sup> |
| IL-6, pg/ml               | 5.2 [3.05; 7]          | 2.6 [1.55; 3.65]        | 1.46 x 10 <sup>-5</sup> |
| WNT5a, pg/ml              | 0.52 [0.32; 0.58]      | 0.33 [0.18; 0.49]       | 0.18                    |
| SFRP5, pg/ml              | 8.34 [4.33; 13.06]     | 7.57 [6.32; 13.55]      | 1                       |
| GLP-1, pg/ml              | 10.31 [3.96; 18.52]    | 5.25 [3.18; 5.61]       | 5.78 x 10 <sup>-3</sup> |
| sDPP-4, ng/ml             | 575.52 [495.84; 660]   | 437.13 [383.13; 526.21] | 4.56 x 10 <sup>-2</sup> |

Continuous data is displayed as median [Interquartile Range]; female sex as number (percentage). <sup>a</sup>Statistical significance between the MARD subtype and the control group was tested using Chi2-tests for categorical variables and Kruskal-Wallis-tests for continuous variables. **Abbreviations:** BMI, Body Mass Index; HOMA-IR, Homeostatic Model Assessment of Insulin Resistance; HOMA-beta, Homeostatic Model Assessment of beta-cell function; CRP, C-reactive protein; IL-6, interleukin 6; Wnt5a, WNT Family Member 5a; SFRP5, secreted frizzled related protein 5; GLP-1, Glucagon-like peptide 1; sDPP-4, soluble Dipeptidylpeptidase 4.
